# Supplementary material for: Automating Epidemiology Report Generation from the MIMIC-IV Clinical Database using SNOMED CT and SQL
Source: Research Square preprint supplement (doi:10.21203/rs.3.rs-7660197/v1), 2025-11-10
Supplement: Supplementary file 1 [file 5b72691033c82aa513920776.docx]

Automating Epidemiology Report Generation from the MIMIC-IV Clinical Database using SNOMED CT and SQL

Houcemeddine Turki1*, Naveed A. Pasha, MD MSc2, Abdullah Altammami, DMD3,4

Anas H. Alzahrani, MD PhD MPH5,6*

1 Department of Computer Science, University of the People, Pasadena, California, USA

2 South City Hospital, Jinnah Sindh Medical University, Karachi, Pakistan

3 Health Informatics, Rutgers University, New Brunswick, USA

4 Public Health and Health Informatics, King Saud Bin Abdulaziz University for Health Sciences, Riyadh, Saudi Arabia

5 Department of Community Medicine, Faculty of Medicine, King Abdulaziz University, Jeddah, Saudi Arabia

6 King Abdulaziz University Hospital, King Abdulaziz University, Jeddah, Saudi Arabia

* Houcemeddine Turki and Anas H. Alzahrani contributed equally

Supplementary Material

Appendix A

Aortic Aneurysm usecae
S1. **Supplementary Figure S1 (Prompt template for SQL condition)**
S2. **Supplementary Figure S2 (Co-occurrence network)**
S1. **Supplementary Table S1 (ICD-10 diagnoses mapped from SNOMED-CT**
S2. **Supplementary Table S2 (SQL conditions)**
S3. **Supplementary Table S3 (Discharge by sex)**
S4. **Supplementary Table S4 (Logistic regression coefficients)**
S5. **Supplementary Table S5 (Prior studies using MIMIC**

**Appendix B**

**Upper Respiratory Tract Infection usecase
N1. Supplementary Figure N1 (Sample data visualizations for cohort: admissions, LOS distribution, LOS by admission type)
N2. Supplementary Figure N2 (Network of SNOMED-CT concept co-occurrence in chest radiology reports)
N1. Supplementary Table N1 (SNOMED-CT terms extracted from radiology and clinical notes)
N2. Supplementary Table N2 (ICD-10 diagnoses mapped from SNOMED-CT for upper respiratory tract infection)
N3. Supplementary Table N3 (SQL conditions for identifying ICD-10 codes related to upper respiratory tract infection)
N4. Supplementary Table N4 (Cohort retrieval by SQL condition)
N5. Supplementary Table N5 (Summary of upper respiratory tract infection cohort)
N6. Supplementary Table N6 (Procedures performed and associations with duration of stay, mortality, and age)
N7. Supplementary Table N7 (Cross-table of discharge location by gender)
N8. Supplementary Table N8 (Logistic regression coefficients predicting safe discharge home)**

**Appendix C**

Python code for the pipline

**Appendix A**

| You are given a medical coding table named icd with columns: icd.code, icd.version, and icd.long_title. This table contains ICD-9 and ICD-10 diagnosis descriptions.  Your task is to identify which diagnosis descriptions refer only to the disease: {disease}.  Return a single SQL WHERE condition that matches relevant entries using icd.long_title and LIKE patterns.  Only include diagnoses that cause {disease}.  Use OR, AND, and parentheses to connect LIKE clauses as needed.  Return only the final SQL condition as a single line of text. No explanation.  Please formulate the SQL condition in a way that it includes all the icd.long_title entries below:  {SNOMED-CT names} |
| --- |

**Supplementary Figure S1** Prompt template for generating a single SQL WHERE condition over icd.long_title for ICD-9/10 diagnoses using SNOMED-derived labels and constrained Boolean patterns.


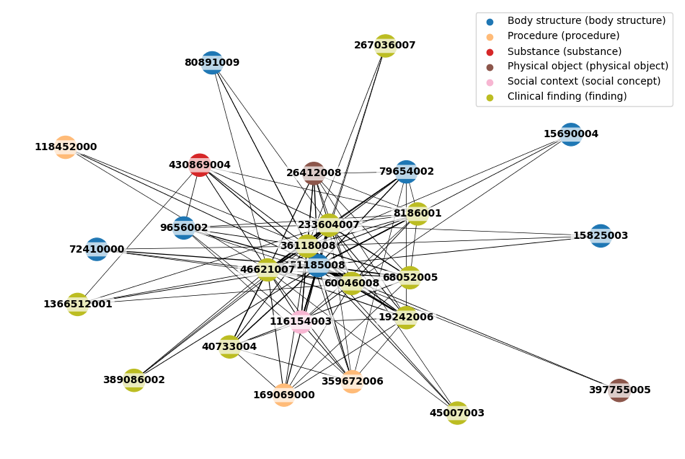


| **SNOMED-CT ID** | **Concept Name** |
| --- | --- |
| 80891009 | Heart |
| 116154003 | Patient |
| 79654002 | Edema |
| 40733004 | Infection |
| 169069000 | Chest CT |
| 267036007 | Dyspnea |
| 46621007 | Atelectasis |
| 45007003 | Hypotension |
| 118452000 | Enlargement |
| 60046008 | Pleural effusion |
| 51185008 | Chest |
| 15825003 | Aorta |
| 233604007 | Pneumonia |
| 1366512001 | Right pleural effusion |
| 72410000 | Mediastinum |
| 36118008 | Pneumothorax |
| 389086002 | Hypoxia |
| 19242006 | Pulmonary edema |
| 8186001 | Cardiomegaly |
| 68052005 | Aspiration |
| 430869004 | Effusion |
| 9656002 | Consolidation |
| 26412008 | Endotracheal tube |
| 359672006 | Median sternotomy |
| 15690004 | Tortuosity |
| 397755005 | Swan-Ganz catheter |

**Supplementary Figure S2** *SNOMED-CT concept co-occurrence network from portable AP chest radiology reports; nodes are mapped SNOMED concepts; edges weighted by co-mentions; layout via a force-directed algorithm.*

**Supplementary Table S1 (SNOMED-CT terms extracted from radiology and clinical notes)**

| **Medical Condition** | **Hospitalizations (n)** |
| --- | --- |
| Aortic aneurysm, unspecified site (without rupture) | 111 |
| Congenital aneurysm of aorta | 71 |
| Other congenital malformations of cardiac chambers and connections | 3 |
| Other congenital malformations of aorta | 3 |
| Aortic aneurysm, unspecified site (ruptured) | 2 |

**Supplementary Table S1 (ICD-10 diagnoses mapped from SNOMED-CT**

| Method | Try | **Description** | SQL Condition |
| --- | --- | --- | --- |
| With SNOMED-CT | A1 | Broad match using “aorta” + “aneurysm/dilatation/ectasia/tunnel” + Valsalva clause | (icd.long_title LIKE '%aorta%' OR icd.long_title LIKE '%aortic%') AND (icd.long_title LIKE '%aneurysm%' OR icd.long_title LIKE '%dilatation%' OR icd.long_title LIKE '%ectasia%' OR icd.long_title LIKE '%tunnel%') OR (icd.long_title LIKE '%Valsalva%' AND icd.long_title LIKE '%aneurysm%') |
| A2 | Targeted phrases including “aortic aneurysm,” “Valsalva,” “annuloaortic ectasia” | (icd.long_title LIKE '%aortic aneurysm%' OR icd.long_title LIKE '%aneurysm of aorta%' OR icd.long_title LIKE '%sinus of Valsalva aneurysm%' OR icd.long_title LIKE '%Annuloaortic ectasia%' OR icd.long_title LIKE '%Syphilitic dilatation of aorta%' OR icd.long_title LIKE '%aortico-left ventricular tunnel%') |
| A3 | Strict matching on “aortic aneurysm” and variants | (icd.long_title LIKE '%aortic aneurysm%') OR (icd.long_title LIKE '%aneurysm of %aorta%') OR (icd.long_title LIKE '%Valsalva aneurysm%') OR (icd.long_title LIKE '%annuloaortic ectasia%') OR (icd.long_title LIKE '%syphilitic dilatation of aorta%') OR (icd.long_title LIKE '%aortic left ventricular tunnel%') |
| Without SNOMED-CT | B1 | Broad pattern: “aorta/aortic” + “aneurysm/pseudoaneurysm” | ((icd.long_title LIKE '%aorta%' OR icd.long_title LIKE '%aortic%') AND (icd.long_title LIKE '%aneurysm%' OR icd.long_title LIKE '%pseudoaneurysm%')) |
| B2 | Targeted phrases including “aortic aneurysm,” “aneurysm of aorta” | (icd.long_title LIKE '%aortic aneurysm%' OR icd.long_title LIKE '%aneurysm of aorta%' OR icd.long_title LIKE '%aneurysm, aorta%' OR icd.long_title LIKE '%aorta aneurysm%') |
| B3 | Extended list including pseudoaneurysm variants | (icd.long_title LIKE '%aortic aneurysm%' OR icd.long_title LIKE '%aneurysm of aorta%' OR icd.long_title LIKE '%aneurysm, aorta%' OR icd.long_title LIKE '%aorta aneurysm%' OR icd.long_title LIKE '%aortic pseudoaneurysm%' OR icd.long_title LIKE '%pseudoaneurysm of aorta%') |

**Supplementary Table S2 (SQL conditions)**

| **Primary Diagnosis** | **SQL Condition(s)** | **Hospitalizations (n)** |
| --- | --- | --- |
| Abdominal aortic aneurysm, without rupture | A1, A2, A3, B1, B2, B3 | 2,075 |
| Thoracic aortic aneurysm, without rupture | A1, A2, A3, B1, B2, B3 | 1,284 |
| Thoracic aortic ectasia | A1 | 418 |
| Thoracoabdominal aortic aneurysm, without rupture | A1, A2, A3, B1, B2, B3 | 89 |
| Abdominal aortic ectasia | A1 | 82 |
| Abdominal aortic aneurysm, ruptured | A1, A2, A3, B1, B2, B3 | 57 |
| Congenital aneurysm of aorta | A1, A2, A3, B1, B2, B3 | 55 |
| Thoracic aortic aneurysm, ruptured | A1, A2, A3, B1, B2, B3 | 22 |
| Thoracoabdominal aortic ectasia | A1 | 13 |
| Thoracoabdominal aortic aneurysm, ruptured | A1, A2, A3, B1, B2, B3 | 10 |

**Supplementary Table S3 (Discharge by sex)**

| **Discharge Location** | **Male (n)** | **Female (n)** |
| --- | --- | --- |
| Acute hospital | 18 | 5 |
| Against medical advice | 11 | 3 |
| Assisted living | 3 | 0 |
| Chronic / long-term acute care | 42 | 25 |
| Died (in-hospital) | 104 | 50 |
| Home | 735 | 276 |
| Home health care | 928 | 446 |
| Hospice | 46 | 21 |
| Other facility | 2 | 1 |
| Psychiatric facility | 3 | 0 |
| Rehabilitation facility | 103 | 33 |
| Skilled nursing facility | 353 | 270 |

Cross-Table of discharge locations in function of gender (Chi2: 55.67, p-value: 5.83e-08, Degrees of Freedom: 11).

**Supplementary Table S4 (Logistic regression coefficients)**

| **Feature** | **Coefficient** |
| --- | --- |
| **Positive predictors (↑ Increased likelihood of discharge home)** |  |
| Race: Hispanic/Latino – Guatemalan | +1.05 |
| Admission type: Surgical same-day | +0.98 |
| Admission type: Direct emergency | +0.86 |
| Admission type: Emergency ward | +0.83 |
| Race: Asian – Asian Indian | +0.82 |
| **Negative predictors (↓ Decreased likelihood of discharge home)** |  |
| Race: Black / Caribbean Island | -1.06 |
| Race: Unable to obtain | -1.06 |
| Admission location: Transfer from skilled nursing | -1.53 |
| Admission type: Direct observation | -1.71 |
| Admission type: EU observation | -2.06 |

Regression coefficients of the logistic regression model predicting safe patient discharge home (Accuracy = 0.75).

**Supplementary Table S5 (Prior studies using MIMIC)**

| **Study / Year** | **Database** | **Cohort Selection Method** | **ICD Codes Used** |
| --- | --- | --- | --- |
| Huang et al., 2021 * | MIMIC-III | Diagnosis + procedure codes to capture AA and surgeries | ICD-9: 441.1, 441.2, 441.3, 441.4, 441.6, 441.7; Procedures: 38.44, 38.45, 39.73, 39.71 |
| Wang et al., 2024 ** | MIMIC-IV | ICD-9 and ICD-10 diagnosed AA admissions, with exclusion filters | ICD-9 & ICD-10 (not specified) |
| Other studies | MIMIC-III / IV | Likely ICD-based selection (details not disclosed) | Not reported |

* Huang K, Shen R, Peng S, et al. Development of SAB model for predicting mortality in intensive care unit after aortic aneurysm surgery. Ann Palliat Med. 2021;10(10):10147-10159. doi:10.21037/apm-21-1660

**Wang, H., Wu, S., Pan, D. et al. Comparison of different intensive care scoring systems and Glasgow Aneurysm score for aortic aneurysm in predicting 28-day mortality: a retrospective cohort study from MIMIC-IV database. BMC Cardiovasc Disord 24, 513 (2024). https://doi.org/10.1186/s12872-024-04184-4

**Appendix B**

A


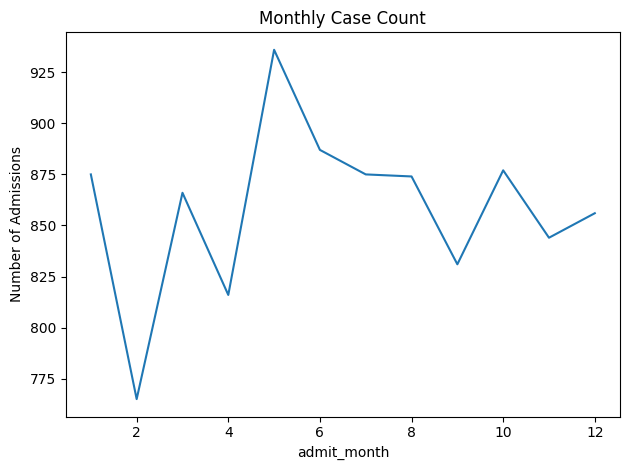


B


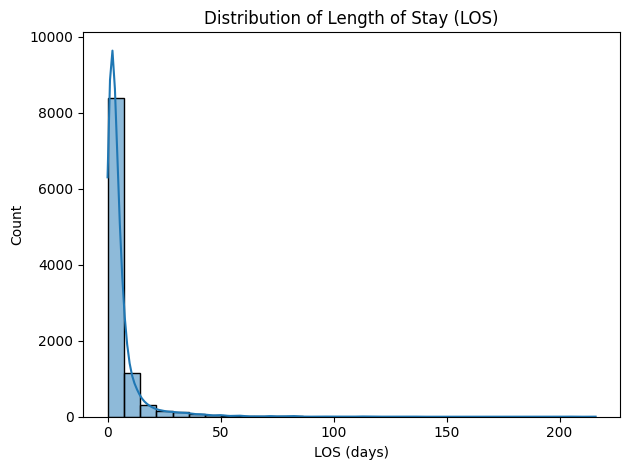


C


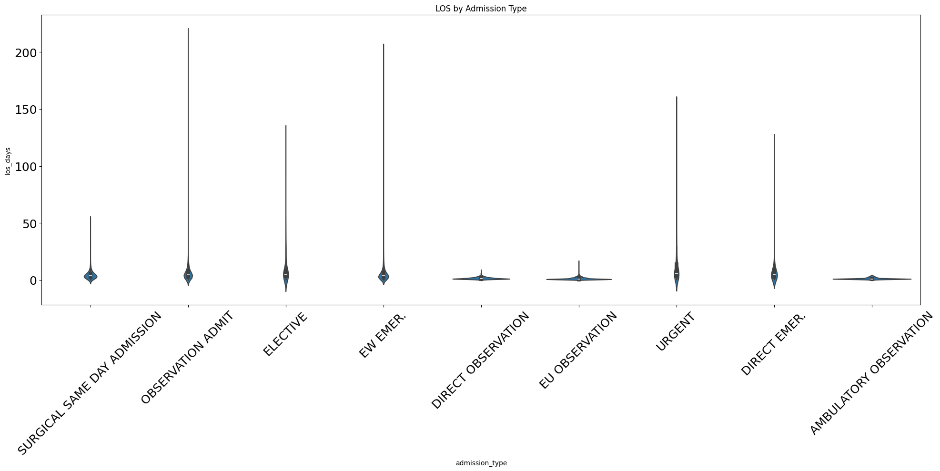


**Supplementary Figure N1** Sample Data Visualizations for the Cohort: (A) Number of Admissions in function of the month of the year, (B) Distribution of hospitalizations per length of stay (LOS), (C) Violin plot for LOS per admission type.


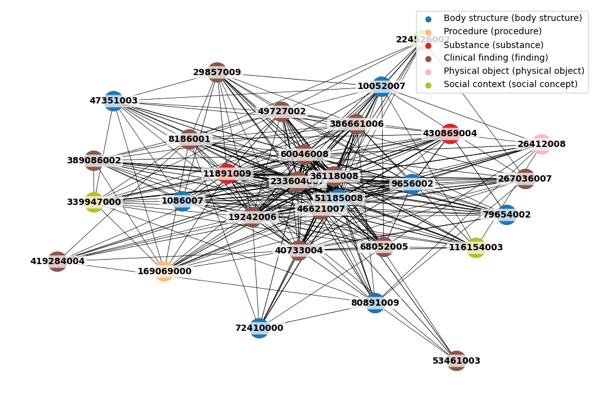


| **SNOMED-CT ID** | **Concept Name** |
| --- | --- |
| 224526002 | Woman |
| 386661006 | Fever |
| 1086007 | Female |
| 49727002 | Cough |
| 8186001 | Cardiomegaly |
| 389086002 | Hypoxia |
| 116154003 | Patient |
| 10052007 | Male |
| 169069000 | Chest CT |
| 40733004 | Infection |
| 53461003 | Normal size |
| 430869004 | Effusion |
| 11891009 | Breath |
| 60046008 | Pleural effusion |
| 19242006 | Pulmonary edema |
| 29857009 | Chest pain |
| 36118008 | Pneumothorax |
| 339947000 | Man |
| 233604007 | Pneumonia |
| 72410000 | Mediastinum |
| 9656002 | Consolidation |
| 51185008 | Chest |
| 80891009 | Heart |
| 419284004 | Altered mental status |
| 79654002 | Edema |
| 68052005 | Aspiration |
| 47351003 | Infiltrate |
| 267036007 | Dyspnea |
| 46621007 | Atelectasis |
| 26412008 | Endotracheal tube |

**Supplementary Table N1.** Network of SNOMED-CT concept co-occurrence in Chest (Portable AP) radiology reports.

**Supplementary Table N1 (SNOMED-CT terms extracted from radiology and clinical notes)**

| Medical Condition | Hospitalizations |
| --- | --- |
| Other specified bacterial agents as the cause of diseases classified elsewhere | 3486 |
| Candidal stomatitis | 1618 |
| Human immunodeficiency virus [HIV] disease | 1468 |
| Acute upper respiratory infection, unspecified | 1159 |
| Viral infection, unspecified | 673 |
| Chronic sinusitis, unspecified | 598 |
| Acute pharyngitis, unspecified | 587 |
| Influenza due to unidentified influenza virus with other respiratory manifestations | 427 |
| Other sites of candidiasis | 360 |
| Influenza due to other identified influenza virus with other respiratory manifestations | 320 |
| Other viral agents as the cause of diseases classified elsewhere | 282 |
| Other specified disorders of nose and nasal sinuses | 207 |
| Unspecified staphylococcus as the cause of diseases classified elsewhere | 195 |
| Chronic rhinitis | 181 |
| Unspecified mycosis | 154 |
| Streptococcal pharyngitis | 105 |
| Acute sinusitis, unspecified | 93 |
| Acute tonsillitis, unspecified | 83 |
| Respiratory syncytial virus as the cause of diseases classified elsewhere | 78 |
| Other diseases of larynx | 75 |
| Herpesviral gingivostomatitis and pharyngotonsillitis | 72 |
| Streptococcus pneumoniae as the cause of diseases classified elsewhere | 53 |
| Hemophilus influenzae [H. influenzae] as the cause of diseases classified elsewhere | 51 |
| Acute laryngitis | 43 |
| Acute pharyngitis due to other specified organisms | 33 |
| Abscess, furuncle and carbuncle of nose | 22 |
| Acute epiglottitis without obstruction | 20 |
| Other forms of aspergillosis | 19 |
| Acute nasopharyngitis [common cold] | 17 |
| Influenza due to other identified influenza virus with other manifestations | 13 |
| Other specified bacterial diseases | 12 |
| Mycoplasma pneumoniae [M. pneumoniae] as the cause of diseases classified elsewhere | 11 |
| Chronic laryngitis | 10 |
| Other specified infestations | 8 |
| Bacterial infection, unspecified | 8 |
| Adenovirus as the cause of diseases classified elsewhere | 6 |
| Acute bronchitis due to respiratory syncytial virus | 6 |
| Other specified viral infections characterized by skin and mucous membrane lesions | 5 |
| Other secondary syphilis of skin | 4 |
| Acute bronchitis due to parainfluenza virus | 4 |
| Papillomavirus as the cause of diseases classified elsewhere | 3 |
| Rhinocerebral mucormycosis | 2 |
| Other respiratory tuberculosis | 2 |
| Enteroviral vesicular pharyngitis | 2 |
| Gonococcal pharyngitis | 1 |
| Pneumonia due to SARS-associated coronavirus | 1 |
| Acute bronchitis due to Hemophilus influenzae | 1 |
| Other Vincent's infections | 1 |
| Acute recurrent streptococcal tonsillitis | 1 |

|  |  |
| --- | --- |
|  |  |
|  |  |

Supplementary Table N2 (ICD-10 diagnoses mapped from SNOMED-CT for upper respiratory tract infection)

| SQL Condition |
| --- |
| (icd.long_title LIKE '%upper respiratory%infection%' OR icd.long_title LIKE '%URI%' OR icd.long_title LIKE '%URTI%' OR icd.long_title LIKE '%upper respiratory symptoms%' OR icd.long_title LIKE '%severe acute respiratory syndrome of upper respiratory tract%' OR icd.long_title LIKE '%common cold%' OR icd.long_title LIKE '%acute coryza%' OR icd.long_title LIKE '%head cold%' OR icd.long_title = 'Cold' OR icd.long_title = 'Cold (disorder)' OR icd.long_title LIKE '%laryngitis%' OR icd.long_title LIKE '%epiglottitis%' OR icd.long_title LIKE '%laryngotrache%' OR icd.long_title LIKE '%croup%' OR icd.long_title LIKE '%laryngeal diphtheria%' OR (icd.long_title LIKE '%larynx%' AND (icd.long_title LIKE '%infection%' OR icd.long_title LIKE '%inflammation%' OR icd.long_title LIKE '%tuberculosis%' OR icd.long_title LIKE '%myiasis%')) OR (icd.long_title LIKE '%glottis%' AND icd.long_title LIKE '%tuberculosis%') OR (icd.long_title LIKE '%vocal cord%' AND icd.long_title LIKE '%papilloma%virus%infection%') OR icd.long_title LIKE '%pharyngitis%' OR icd.long_title LIKE '%tonsillitis%' OR icd.long_title LIKE '%adenoiditis%' OR icd.long_title LIKE '%pharyngoconjunctivitis%' OR icd.long_title LIKE '%pharyngoconjunctival fever%' OR icd.long_title LIKE '%herpangina%' OR icd.long_title LIKE '%sore throat%' OR icd.long_title LIKE '%vincent%s angina%' OR icd.long_title LIKE '%vincent angina%' OR icd.long_title LIKE '%fusospirochetal pharyngitis%' OR icd.long_title LIKE '%fusobacterial necrotizing tonsillitis%' OR icd.long_title LIKE '%nasopharyngeal diphtheria%' OR (icd.long_title LIKE '%nasopharyngeal%' AND (icd.long_title LIKE '%tuberculosis%' OR icd.long_title LIKE '%myiasis%' OR icd.long_title LIKE '%fascioliasis%' OR icd.long_title LIKE '%lingu%')) OR icd.long_title LIKE '%rhinopharyngitis%' OR (icd.long_title LIKE '%pharynx%' AND (icd.long_title LIKE '%diphtheria%' OR icd.long_title LIKE '%syphilis%' OR icd.long_title LIKE '%tuberculosis%' OR icd.long_title LIKE '%gonorrhea%' OR icd.long_title LIKE '%candidiasis%' OR icd.long_title LIKE '%actinomycosis%' OR icd.long_title LIKE '%inflammation%' OR icd.long_title LIKE '%infection%')) OR (icd.long_title LIKE '%tonsil%' AND (icd.long_title LIKE '%actinomycosis%' OR icd.long_title LIKE '%syphilis%' OR icd.long_title LIKE '%tuberculosis%' OR icd.long_title LIKE '%aspergillosis%' OR icd.long_title LIKE '%remnant%infection%')) OR icd.long_title LIKE '%rhinitis%' OR icd.long_title LIKE '%sinusitis%' OR icd.long_title LIKE '%rhinoscleroma%' OR icd.long_title LIKE '%scleroma%' OR icd.long_title = 'Scleroma (disorder)' OR icd.long_title LIKE '%nasal diphtheria%' OR icd.long_title LIKE '%nasal syphilis%' OR icd.long_title LIKE '%congenital syphilitic rhinitis%' OR icd.long_title LIKE '%congenital syphilitic chronic coryza%' OR (icd.long_title LIKE '%nasal%' AND (icd.long_title LIKE '%gangosa%' OR icd.long_title LIKE '%yaws%' OR icd.long_title LIKE '%tuberculosis%' OR icd.long_title LIKE '%furuncle%' OR icd.long_title LIKE '%boil%' OR icd.long_title LIKE '%carbuncle%' OR icd.long_title LIKE '%mucous cyst%' OR icd.long_title LIKE '%mucopyocele%' OR icd.long_title LIKE '%candidiasis%' OR icd.long_title LIKE '%ulceration%histoplasmosis%')) OR icd.long_title = 'Gangosa' OR icd.long_title = 'Gangosa (disorder)' OR (icd.long_title LIKE '%nasal sinus%' AND (icd.long_title LIKE '%tuberculosis%' OR icd.long_title LIKE '%mucous cyst%' OR icd.long_title LIKE '%mucopyocele%' OR icd.long_title LIKE '%aspergillosis%')) OR (icd.long_title LIKE '%rhinocerebral%' AND (icd.long_title LIKE '%mucormycosis%' OR icd.long_title LIKE '%phycomycosis%')) OR icd.long_title LIKE '%purulent rhinitis%' OR icd.long_title LIKE '%paracoccidioidomycosis%' OR icd.long_title = 'Halzoun' OR icd.long_title = 'Halzoun (disorder)' OR icd.long_title = 'Marrara' OR icd.long_title = 'Marrara (disorder)' OR icd.long_title LIKE 'Marrara syndrome%' OR icd.long_title = 'Bull nose' OR icd.long_title = 'Bull nose (disorder)') |

**Supplementary Table N3 (SQL conditions for identifying ICD-10 codes related to upper respiratory tract infection)**

| Primary Diagnosis | Hospitalizations |
| --- | --- |
| Acute upper respiratory infections of unspecified site | 1518 |
| Acute upper respiratory infection, unspecified | 1269 |
| Allergic rhinitis, unspecified | 973 |
| Allergic rhinitis, cause unspecified | 843 |
| Unspecified sinusitis (chronic) | 801 |
| Other seasonal allergic rhinitis | 760 |
| Chronic sinusitis, unspecified | 650 |
| Acute pharyngitis, unspecified | 627 |
| Acute pharyngitis | 591 |
| Chronic rhinitis | 296 |
| Acute sinusitis, unspecified | 279 |
| Chronic maxillary sinusitis | 172 |
| Other chronic sinusitis | 155 |
| Streptococcal sore throat | 144 |
| Allergic rhinitis due to pollen | 112 |
| Streptococcal pharyngitis | 105 |
| Acute tonsillitis | 101 |
| Allergic rhinitis due to other allergen | 87 |
| Acute tonsillitis, unspecified | 85 |
| Herpesviral gingivostomatitis and pharyngotonsillitis | 80 |
| Acute laryngitis | 55 |
| Other acute sinusitis | 51 |
| Chronic sphenoidal sinusitis | 48 |
| Acute pharyngitis due to other specified organisms | 47 |
| Acute laryngitis without mention of obstruction | 44 |
| Acute nasopharyngitis [common cold] | 38 |
| Acute maxillary sinusitis | 37 |
| Other allergic rhinitis | 35 |
| Chronic pansinusitis | 32 |
| Acute maxillary sinusitis, unspecified | 27 |
| Acute epiglottitis without obstruction | 26 |
| Chronic tonsillitis | 22 |
| Acute upper respiratory infections of other multiple sites | 21 |
| Acute epiglottitis without mention of obstruction | 20 |
| Chronic laryngitis | 15 |
| Acute recurrent tonsillitis, unspecified | 12 |
| Chronic frontal sinusitis | 12 |
| Chronic ethmoidal sinusitis | 11 |
| Acute sphenoidal sinusitis | 11 |
| Acute pansinusitis, unspecified | 8 |
| Acute sphenoidal sinusitis, unspecified | 7 |
| Acute recurrent sinusitis, unspecified | 7 |
| Chronic pharyngitis | 7 |
| Acute frontal sinusitis | 5 |
| Acute streptococcal tonsillitis, unspecified | 5 |
| Acute epiglottitis with obstruction | 5 |
| Acute frontal sinusitis, unspecified | 5 |
| Acute ethmoidal sinusitis | 4 |
| Vasomotor rhinitis | 4 |
| Chronic laryngotracheitis | 4 |
| Acute ethmoidal sinusitis, unspecified | 3 |
| Allergic rhinitis due to animal (cat) (dog) hair and dander | 3 |
| Chronic tonsillitis and adenoiditis | 3 |
| Acute laryngopharyngitis | 3 |
| Acute laryngotracheitis | 3 |
| Enteroviral vesicular pharyngitis | 2 |
| Acute tonsillitis due to other specified organisms | 2 |
| Chronic adenoiditis | 2 |
| Acute recurrent pansinusitis | 1 |
| Gonococcal pharyngitis | 1 |
| Poisoning by anti-common cold drugs | 1 |
| Acute recurrent streptococcal tonsillitis | 1 |
| Chronic nasopharyngitis | 1 |
| Other acute recurrent sinusitis | 1 |
| Acute laryngotracheitis with obstruction | 1 |
| Gonococcal infection of pharynx | 1 |

**Supplementary Table N5 (Summary of upper respiratory tract infection cohort)**

| Finding | Criteria | Hospitalizations |
| --- | --- | --- |
| Common Primary Diagnoses | Acute upper respiratory infections of unspecified site | 1518 |
| Acute upper respiratory infection, unspecified | 1269 |
| Allergic rhinitis, unspecified | 973 |
| Common Comorbidities | Unspecified essential hypertension | 220 |
| Essential (primary) hypertension | 201 |
| Hyperlipidemia, unspecified | 158 |
| Patients with any abnormal labs | | 961 (9.3%) |
| Most common abnormal labs | Red Blood Cells (Reduced) | 704 |
| Hemoglobin (Reduced) | 680 |
| Hematocrit (Reduced) | 647 |
| Glucose (Elevated) | 577 |
| Platelet Count (Reduced) | 242 |
| Mean BMI (if available) | | 50.9 |
| Mean Blood Pressure at Admission | Systolic | 98.9 |
| Diastolic | 63.5 |
| Mean Length of Stay (days) | | 5.76 (95% CI: 5.56 – 5.97) |
| Hospitalization Outcome | Discharged Home | 4313 (41.9%, 95% CI: 40.9% – 42.8%) |
| Discharged to Rehab/Nursing | 938 (9.1%, 95% CI: 8.5% – 9.7%) |
| In-Hospital Deaths | 127 (1.2%, 95% CI: 1.0% – 1.4%) |

**Supplementary Table N6 (Procedures performed and associations with duration of stay, mortality, and age)**

| **Procedure (shortened)** | **Count** | **Mean DOS (days, 95% CI)** | **DOS SSMD** | **Mortality % (95% CI)** | **p-value** | **Mortality vs Population** | **Mean Age (95% CI)** | **Age SSMD** |
| --- | --- | --- | --- | --- | --- | --- | --- | --- |
| Infusion device → SVC (percutaneous) | 318 | 24.37 (21.52–27.23) | 0.700 | 11.0 (7.6–14.4) | 0.000 | Higher | 58.2 (56.5–60.0) | 0.142 |
| Venous catheterization (NEC) | 234 | 16.29 (13.91–18.68) | 0.510 | 3.8 (1.4–6.3) | 0.001 | Higher | 57.7 (55.6–59.7) | 0.116 |
| Respiratory measurement (nonoperative) | 223 | 0.74 (0.67–0.81) | -0.480 | 0.0 (0.0–0.0) | 0.119 | Lower | 44.8 (42.0–47.5) | -0.372 |
| Enteral infusion (nutritional substances) | 197 | 21.85 (19.01–24.68) | 0.727 | 9.6 (5.5–13.8) | 0.000 | Higher | 56.0 (53.8–58.2) | 0.045 |
| Nutritional substance → Upper GI (natural/artificial) | 189 | 28.14 (24.51–31.77) | 0.842 | 15.3 (10.2–20.5) | 0.000 | Higher | 57.8 (55.7–59.9) | 0.123 |
| Antineoplastic infusion → Central vein (percutaneous) | 182 | 21.22 (17.92–24.53) | 0.636 | 6.0 (2.6–9.5) | 0.000 | Higher | 57.2 (55.1–59.3) | 0.101 |

**Supplementary Table N7 (Cross-table of discharge location by gender)**

| **Discharge Location** | **Male** | **Female** | **Total** |
| --- | --- | --- | --- |
| **Acute hospital** | 29 | 20 | 49 |
| **Against advice (self-discharge)** | 27 | 11 | 38 |
| **Assisted living** | 4 | 5 | 9 |
| **Chronic / long-term acute care** | 57 | 57 | 114 |
| **Died (in-hospital deaths)** | 72 | 55 | 127 |
| **Healthcare facility** | 1 | 0 | 1 |
| **Home (independent discharge)** | 1,943 | 2,370 | 4,313 |
| **Home with health care support** | 747 | 1,161 | 1,908 |
| **Hospice** | 29 | 27 | 56 |
| **Other facility** | 16 | 10 | 26 |
| **Psychiatric facility** | 27 | 31 | 58 |
| **Rehabilitation facility** | 87 | 82 | 169 |
| **Skilled nursing facility** | 277 | 492 | 769 |

**Table A7.** Supplementary Table N8 (Logistic regression coefficients predicting safe discharge home)

| **Feature** | **Coefficient** |
| --- | --- |
| **Positive predictors (↑ likelihood of discharge home)** |  |
| Direct Emergency Admission | 1.540 |
| Elective Admission | 1.524 |
| Emergency Ward Admission | 1.324 |
| Urgent Admission | 1.318 |
| Observation Admission | 1.298 |
| **Negative predictors (↓ likelihood of discharge home)** |  |
| Admission Location: Information Not Available | -1.113 |
| Transfer from Skilled Nursing Facility | -1.715 |
| Ambulatory Observation Admission | -1.990 |
| Direct Observation Admission | -2.583 |
| EU Observation Admission | -4.053 |

**Appendix C**

"""

RealEpi Pipeline: Automated Epidemiology Report Generation from MIMIC-IV

"""

import pandas as pd

from rdflib import Graph, URIRef

from google.cloud import bigquery

import google.generativeai as genai

import spacy

from scipy import stats

import numpy as np

# 1. ONTOLOGY EXPANSION - Extract SNOMED-CT descendants for target disease

def expand_snomed_concept(g, root_concept="233985008"): # Aortic aneurysm

"""Traverse SNOMED hierarchy to harvest all descendant labels"""

query = f"""

PREFIX rdfs: <http://www.w3.org/2000/01/rdf-schema#>

PREFIX owl: <http://www.w3.org/2002/07/owl#>

PREFIX sn: <http://snomed.info/id/>

PREFIX st: <http://snomed.info/field/>

SELECT DISTINCT ?subject ?label WHERE {{

VALUES ?prop {{st:Description.term.en-us.preferred st:Description.term.en-us.synonym}}

?subject (rdfs:subClassOf*|owl:equivalentClass/owl:intersectionOf/rdf:rest*/rdf:first)* sn:{root_concept} .

?subject ?prop ?label .

}}"""

return pd.DataFrame([(str(r[0]), str(r[1])) for r in g.query(query)],

columns=['ConceptID', 'Label'])

# 2. LLM-ASSISTED SQL SYNTHESIS - Generate ICD WHERE clause from SNOMED labels

def generate_sql_condition(labels_df, disease_name, llm_key):

genai.configure(api_key=llm_key)

model = genai.GenerativeModel("models/gemini-2.5-flash")

prompt = f"""Generate SQL WHERE condition for '{disease_name}' using LIKE patterns.

Include ONLY diagnoses from: {labels_df['Label'].tolist()}

Return single line: icd.long_title LIKE '%pattern1%' OR icd.long_title LIKE '%pattern2%'"""

return model.generate_content(prompt).text.strip('`')

# 3. COHORT EXTRACTION - Query MIMIC-IV with generated SQL

def extract_cohort(client, sql_condition):

query = f"""

WITH cohort AS (

SELECT DISTINCT a.subject_id, a.hadm_id, icd.long_title as diagnosis,

a.admittime, a.dischtime, a.hospital_expire_flag,

p.gender, p.anchor_age, a.admission_type, a.discharge_location

FROM `physionet-data.mimiciv_hosp.admissions` a

JOIN `physionet-data.mimiciv_hosp.diagnoses_icd` d ON a.hadm_id = d.hadm_id

JOIN `physionet-data.mimiciv_hosp.d_icd_diagnoses` icd

ON d.icd_code = icd.icd_code AND d.icd_version = icd.icd_version

JOIN `physionet-data.mimiciv_hosp.patients` p ON a.subject_id = p.subject_id

WHERE {sql_condition} AND d.seq_num = 1

),

labs AS (

SELECT c.hadm_id, dl.label,

AVG(le.valuenum) as avg_val, ANY_VALUE(le.ref_range_upper) as ref_upper

FROM cohort c

JOIN `physionet-data.mimiciv_hosp.labevents` le ON c.hadm_id = le.hadm_id

JOIN `physionet-data.mimiciv_hosp.d_labitems` dl ON le.itemid = dl.itemid

WHERE DATETIME_DIFF(le.charttime, c.admittime, HOUR) BETWEEN 0 AND 48

GROUP BY c.hadm_id, dl.label

)

SELECT c.*, STRING_AGG(CASE WHEN l.avg_val > l.ref_upper

THEN CONCAT(l.label, ' (Elevated)') END, '; ') as abnormal_labs

FROM cohort c LEFT JOIN labs l ON c.hadm_id = l.hadm_id

GROUP BY ALL"""

return client.query(query).to_dataframe()

# 4. CLINICAL NOTES NER - Extract SNOMED entities from narratives

def extract_note_entities(df, snomed_labels, nlp):

"""Map clinical text to SNOMED concepts via NER + string matching"""

entity_index = {label.lower(): cid for cid, label in snomed_labels.values}

def process_note(text):

if pd.isna(text): return []

doc = nlp(text)

entities = []

for chunk in doc.noun_chunks:

if chunk.text.lower() in entity_index:

entities.append(entity_index[chunk.text.lower()])

return entities

df['note_concepts'] = df['discharge_text'].apply(process_note)

return df

# 5. STATISTICAL ANALYSIS - Generate epidemiology metrics

def generate_statistics(df):

"""Compute key epidemiological metrics with 95% CI"""

df['los_days'] = (pd.to_datetime(df['dischtime']) -

pd.to_datetime(df['admittime'])).dt.total_seconds() / 86400

# Proportions with Wilson CI

n = len(df)

mortality_rate = df['hospital_expire_flag'].sum() / n

mort_ci = stats.binom.wilson_confint(df['hospital_expire_flag'].sum(), n)

# Continuous variables

los_mean = df['los_days'].mean()

los_ci = stats.t.interval(0.95, n-1, los_mean, df['los_days'].std()/np.sqrt(n))

return {

'N': n,

'Mortality': f"{mortality_rate:.1%} (95% CI: {mort_ci[0]:.1%}-{mort_ci[1]:.1%})",

'Mean_LOS': f"{los_mean:.1f} days (95% CI: {los_ci[0]:.1f}-{los_ci[1]:.1f})",

'Abnormal_Labs': df['abnormal_labs'].notna().sum()

}

# MAIN PIPELINE EXECUTION

if __name__ == "__main__":

# Load SNOMED graph

g = Graph()

g.parse("snomed_20250701.ttl", format="ttl")

# Step 1: Expand disease concept

labels = expand_snomed_concept(g, "233985008") # Aortic aneurysm

# Step 2: Generate SQL

condition = generate_sql_condition(labels, "aortic aneurysm", "YOUR_API_KEY")

# Step 3: Extract cohort

client = bigquery.Client(project="your-project")

cohort_df = extract_cohort(client, condition)

# Step 4: Process notes (if discharge summaries included)

nlp = spacy.load("en_core_web_sm")

cohort_df = extract_note_entities(cohort_df, labels, nlp)

# Step 5: Generate report

stats = generate_statistics(cohort_df)

print(f"Cohort Statistics: {stats}")

cohort_df.to_csv("cohort_output.csv", index=False)
